# Supplementary material
Source: publisher site journal article supplement (https://static.cambridge.org/content/id/urn:cambridge.org:id:article:S1748499520000226/resource/name/S1748499520000226supp001.xlsx)
Supplement: Supplementary file 1 [file S1748499520000226supp001.xlsx]

## Sheet: README
Health status categorisation for UK Biobank
This spreadsheet categorises self-reported diagnoses at UK Biobank baseline assessment, enabling participants to be partitioned in to two groups of 'healthy' or 'not healthy'
The categorisation is from standard insurance classifications into standard or non-standard risks, based on information shared by RGA Reinsurance Company
Of 444 self-reported health issues, 184 were assigned as “not likely acceptable for standard life insurance rates”
Any UK Biobank participant self-reporting one or more of these 184 health issues was excluded from the healthy subgroup.
Any participant reporting a cancer code (see cancer_self_reported_codes tab) was categorised as “not likely acceptable for standard life insurance rates”
Approximately 70% of UK Biobank participants are classified as 'healthy' using this codes, depending on other exclusions for quality control or genetic data.
Column headings
UK Biobank coding	http://biobank.ndph.ox.ac.uk/showcase/coding.cgi?id=6
Disorder/Cancer	Name of reported disease or cancer
Health status: Standard risk	Y/N	Y = healthy, standard insurance risk. N= non-standard insurance risk
Cathryn Lewis
cathryn.lewis@kcl.ac.uk
2020-05-01

## Sheet: non_cancer_self_reported_codes
UK Biobank coding	Disorder	Healthy (Yes/No)	Disorder group
1065	hypertension	Y	NA
1066	heart/cardiac problem	N	cardiovascular
1067	peripheral vascular disease	N	cardiovascular
1068	venous thromboembolic disease	N	cardiovascular
1072	essential hypertension	Y	NA
1073	gestational hypertension/pre-eclampsia	Y	NA
1074	angina	N	cardiovascular
1075	heart attack/myocardial infarction	N	cardiovascular
1076	heart failure/pulmonary odema	N	cardiovascular
1077	heart arrhythmia	N	cardiovascular
1078	heart valve problem/heart murmur	N	cardiovascular
1079	cardiomyopathy	N	cardiovascular
1080	pericardial problem	N	cardiovascular
1081	stroke	N	cardiovascular
1082	transient ischaemic attack (tia)	N	cardiovascular
1083	subdural haemorrhage/haematoma	N	cardiovascular
1086	subarachnoid haemorrhage	N	cardiovascular
1087	leg claudication/ intermittent claudication	Y	NA
1088	arterial embolism	N	cardiovascular
1093	pulmonary embolism +/- dvt	N	cardiovascular
1094	deep venous thrombosis (dvt)	N	cardiovascular
1111	asthma	Y	NA
1112	chronic obstructive airways disease/copd	N	respiratory
1113	emphysema/chronic bronchitis	N	respiratory
1114	bronchiectasis	Y	NA
1115	interstitial lung disease	N	respiratory
1117	other respiratory problems	N	respiratory
1120	asbestosis	N	respiratory
1121	pulmonary fibrosis	N	respiratory
1122	fibrosing alveolitis/unspecified alveolitis	N	respiratory
1123	sleep apnoea	Y	NA
1124	respiratory failure	N	respiratory
1125	pleurisy	N	respiratory
1126	spontaneous pneumothorax/recurrent pneumothorax	N	respiratory
1134	oesophageal disorder	N	gastrointestinal
1135	stomach disorder	N	gastrointestinal
1136	liver/biliary/pancreas problem	N	gastrointestinal
1137	other abdominal problem	N	gastrointestinal
1138	gastro-oesophageal reflux (gord) / gastric reflux	Y	NA
1139	oesophagitis/barretts oesophagus	N	gastrointestinal
1140	oesophageal stricture	N	gastrointestinal
1141	oesophageal varicies	N	gastrointestinal
1142	gastric/stomach ulcers	Y	NA
1143	gastritis/gastric erosions	Y	NA
1154	irritable bowel syndrome	Y	NA
1155	hepatitis	N	gastrointestinal
1156	infective/viral hepatitis	N	gastrointestinal
1157	non-infective hepatitis	N	gastrointestinal
1158	liver failure/cirrhosis	N	gastrointestinal
1159	bile duct disease	Y	NA
1160	bile duct obstruction/ascending cholangitis	Y	NA
1161	gall bladder disease	N	gastrointestinal
1162	cholelithiasis/gall stones	Y	NA
1163	cholecystitis	Y	NA
1164	pancreatic disease	N	gastrointestinal
1165	pancreatitis	N	gastrointestinal
1190	peritonitis	N	gastrointestinal
1191	gastrointestinal bleeding	N	gastrointestinal
1192	renal/kidney failure	N	renal
1193	renal failure requiring dialysis	N	renal
1194	renal failure not requiring dialysis	N	renal
1196	urinary tract infection/kidney infections	Y	NA
1197	kidney stone/ureter stone/bladder stone	Y	NA
1200	ureteric obstruction/hydronephrosis	N	renal
1201	bladder problem (not cancer)	Y	NA
1202	urinary frequency / incontinence	Y	NA
1207	prostate problem (not cancer)	Y	NA
1210	scrotal problem (not cancer)	Y	NA
1214	testicular problems (not cancer)	Y	NA
1220	diabetes	N	diabetes
1221	gestational diabetes	N	diabetes
1222	type 1 diabetes	N	diabetes
1223	type 2 diabetes	N	diabetes
1224	thyroid problem (not cancer)	Y	NA
1225	hyperthyroidism/thyrotoxicosis	Y	NA
1226	hypothyroidism/myxoedema	Y	NA
1228	thyroid radioablation therapy	Y	NA
1229	parathyroid gland problem (not cancer)	Y	NA
1230	parathyroid hyperplasia/adenoma	Y	NA
1232	disorder of adrenal gland	Y	NA
1233	adrenal tumour	N	endocrine
1234	adrenocortical insufficiency/addison's disease	Y	NA
1235	hyperaldosteronism/conn's syndrome	Y	NA
1236	phaeochromocytoma	N	endocrine
1237	disorder or pituitary gland	Y	NA
1238	pituitary adenoma/tumour	N	endocrine
1239	cushings syndrome	Y	NA
1240	neurological injury/trauma	N	neurology
1242	eye/eyelid problem	Y	NA
1243	psychological/psychiatric problem	N	psychiatry
1244	infection of nervous system	N	neurology
1245	brain abscess/intracranial abscess	N	neurology
1246	encephalitis	N	neurology
1247	meningitis	N	neurology
1248	spinal abscess	N	neurology
1249	cranial nerve problem/palsy	N	neurology
1250	bell's palsy/facial nerve palsy	Y	NA
1251	spinal cord disorder	N	neurology
1252	paraplegia	N	neurology
1254	peripheral nerve disorder	N	neurology
1255	peripheral neuropathy	N	neurology
1256	acute infective polyneuritis/guillain-barre syndrome	N	neurology
1257	trapped nerve/compressed nerve	Y	NA
1258	chronic/degenerative neurological problem	N	neurology
1259	motor neurone disease	N	neurology
1260	myasthenia gravis	N	neurology
1261	multiple sclerosis	N	neurology
1262	parkinsons disease	N	neurology
1263	dementia/alzheimers/cognitive impairment	N	neurology
1264	epilepsy	N	neurology
1265	migraine	Y	NA
1266	head injury	N	head_injury
1267	spinal injury	N	neurology
1274	eye infection	Y	NA
1275	retinal problem	Y	NA
1276	diabetic eye disease	N	diabetes
1277	glaucoma	Y	NA
1278	cataract	Y	NA
1279	eye trauma	Y	NA
1281	retinal detachment	Y	NA
1282	retinal artery/vein occlusion	Y	NA
1286	depression	psychiatry
1287	anxiety/panic attacks	N	psychiatry
1288	nervous breakdown	N	psychiatry
1289	schizophrenia	N	psychiatry
1290	deliberate self-harm/suicide attempt	N	psychiatry
1291	mania/bipolar disorder/manic depression	N	psychiatry
1293	bone disorder	Y	NA
1294	back problem	Y	NA
1295	joint disorder	Y	NA
1297	muscle/soft tissue problem	Y	NA
1308	osteomyelitis	Y	NA
1309	osteoporosis	Y	NA
1310	paget's disease	Y	NA
1311	spine arthritis/spondylitis	Y	NA
1312	prolapsed disc/slipped disc	Y	NA
1313	ankylosing spondylitis	Y	NA
1322	myositis/myopathy	Y	NA
1327	low platelets/platelet disorder	N	haematology
1328	haemophilia	N	haematology
1330	iron deficiency anaemia	Y	NA
1331	pernicious anaemia	N	haematology
1332	aplastic anaemia	N	haematology
1339	sickle cell disease	N	haematology
1340	thalassaemia	Y	haematology
1344	stevens johnson syndrome	Y	NA
1345	pemphigoid/pemphigus	Y	NA
1348	gynaecological disorder (not cancer)	Y	NA
1349	ovarian cyst or cysts	Y	NA
1350	polycystic ovaries/polycystic ovarian syndrome	Y	NA
1351	uterine fibroids	Y	NA
1352	uterine polyps	Y	NA
1353	vaginal prolapse/uterine prolapse	Y	NA
1364	breast disease (not cancer)	Y	NA
1366	fibrocystic disease	Y	NA
1367	breast cysts	Y	NA
1371	sarcoidosis	N	immunological
1372	vasculitis	N	immunological
1373	connective tissue disorder	N	immunological
1374	allergy/hypersensitivity/anaphylaxis	Y	NA
1376	giant cell/temporal arteritis	N	immunological
1377	polymyalgia rheumatica	Y	NA
1378	wegners granulmatosis	N	immunological
1379	microscopic polyarteritis	N	immunological
1380	polyartertis nodosa	N	immunological
1381	systemic lupus erythematosis/sle	N	immunological
1382	sjogren's syndrome/sicca syndrome	Y	immunological
1383	dermatopolymyositis	N	immunological
1384	scleroderma/systemic sclerosis	N	immunological
1385	allergy or anaphylactic reaction to food	Y	NA
1386	allergy or anaphylactic reaction to drug	Y	NA
1387	hayfever/allergic rhinitis	Y	NA
1394	peripheral nerve injury	Y	NA
1396	enlarged prostate	Y	NA
1397	other demyelinating disease (not multiple sclerosis)	N	neurology
1398	pneumonia	N	respiratory
1400	peptic ulcer	Y	NA
1402	endometriosis	Y	NA
1403	female infertility	Y	NA
1404	male infertility	Y	NA
1405	other renal/kidney problem	N	renal
1406	muscle or soft tissue injuries	Y	NA
1407	burns	Y	NA
1408	alcohol dependency	N	psychiatry
1409	opioid dependency	N	psychiatry
1410	other substance abuse/dependency	N	psychiatry
1411	lung abscess	Y	NA
1412	bronchitis	Y	NA
1413	nasal/sinus disorder	Y	NA
1414	throat or larynx disorder	Y	NA
1415	ear/vestibular disorder	Y	NA
1416	chronic sinusitis	Y	NA
1417	nasal polyps	Y	NA
1418	chronic laryngitis	Y	NA
1419	vocal cord polyp	Y	NA
1420	otosclerosis	Y	NA
1421	meniere's disease	Y	NA
1425	cerebral aneurysm	N	cardiovascular
1426	myocarditis	N	cardiovascular
1427	polycystic kidney	N	renal
1428	thyroiditis	Y	NA
1429	acromegaly	Y	NA
1430	hypopituitarism	Y	NA
1431	hyperprolactinaemia	Y	NA
1432	carcinoid syndrome/tumour	N	endocrine
1433	cerebral palsy	N	neurology
1434	other neurological problem	N	neurology
1435	optic neuritis	N	eye
1436	headaches (not migraine)	Y	NA
1437	myasthenia gravis	N	neurology
1438	polycythaemia vera	N	haematology
1439	hiv/aids	N	infections
1440	tuberculosis (tb)	N	infections
1441	malaria	N	infections
1442	helicobacter pylori	Y	NA
1443	schistosomiasis/bilharzia	N	infections
1445	clotting disorder/excessive bleeding	N	haematology
1446	anaemia	Y	NA
1447	pancytopenia	N	haematology
1448	neutropenia/lymphopenia	N	haematology
1449	myeloproliferative disorder	N	haematology
1450	monoclonal gammopathy/not myeloma	N	haematology
1451	hereditary/genetic haematological disorder	N	haematology
1452	eczema/dermatitis	Y	NA
1453	psoriasis	Y	NA
1454	blistering/desquamating skin disorder	Y	NA
1455	chronic skin ulcers	Y	NA
1456	malabsorption/coeliac disease	N	gastrointestinal
1457	duodenal ulcer	Y	NA
1458	diverticular disease/diverticulitis	Y	NA
1459	colitis/not crohns or ulcerative colitis	Y	NA
1460	rectal or colon adenoma/polyps	N	gastrointestinal
1461	inflammatory bowel disease	Y	NA
1462	crohns disease	N	gastrointestinal
1463	ulcerative colitis	N	gastrointestinal
1464	rheumatoid arthritis	N	musculoskeletal
1465	osteoarthritis	Y	NA
1466	gout	Y	NA
1467	other joint disorder	Y	NA
1468	diabetic neuropathy/ulcers	N	diabetes
1469	post-traumatic stress disorder	N	psychiatry
1470	anorexia/bulimia/other eating disorder	N	psychiatry
1471	atrial fibrillation	N	cardiovascular
1472	emphysema	N	respiratory
1473	high cholesterol	Y	NA
1474	hiatus hernia	Y	NA
1475	sclerosing cholangitis	N	gastrointestinal
1476	sciatica	Y	NA
1477	psoriatic arthropathy	Y	NA
1478	cervical spondylosis	Y	NA
1479	rheumatic fever	N	cardiovascular
1480	dermatomyositis	N	immunological
1481	polymyositis	N	immunological
1482	chronic fatigue syndrome	Y	NA
1483	atrial flutter	N	cardiovascular
1484	wolff parkinson white / wpw syndrome	Y	NA
1485	irregular heart beat	N	cardiovascular
1486	sick sinus syndrome	N	cardiovascular
1487	svt / supraventricular tachycardia	Y	NA
1488	mitral valve prolapse	N	cardiovascular
1489	mitral stenosis	N	cardiovascular
1490	aortic stenosis	N	cardiovascular
1491	brain haemorrhage	N	cardiovascular
1492	aortic aneurysm	N	cardiovascular
1493	other venous/lymphatic disease	N	cardiovascular
1494	varicose veins	Y	NA
1495	lymphoedema	Y	NA
1496	alpha-1 antitrypsin deficiency	N	respiratory
1497	pneumothorax	Y	NA
1498	empyema	Y	NA
1499	labyrinthitis	Y	NA
1500	vertigo	Y	NA
1501	pyloric stenosis	Y	NA
1502	appendicitis	Y	NA
1503	anal problem	Y	NA
1504	anal fissure	Y	NA
1505	haemorrhoids / piles	Y	NA
1506	primary biliary cirrhosis	N	gastrointestinal
1507	haemochromatosis	N	gastrointestinal
1508	jaundice (unknown cause)	N	gastrointestinal
1509	gastroenteritis/dysentry	Y	NA
1510	dyspepsia / indigestion	Y	NA
1511	abdominal hernia	Y	NA
1512	umbilical hernia	Y	NA
1513	inguinal hernia	Y	NA
1514	cystitis	Y	NA
1515	pyelonephritis	Y	NA
1516	bph / benign prostatic hypertrophy	Y	NA
1517	prostatitis	Y	NA
1518	erectile dysfunction / impotence	Y	NA
1519	kidney nephropathy	N	renal
1520	iga nephropathy	N	renal
1521	diabetes insipidus	N	diabetes
1522	grave's disease	Y	NA
1523	trigemminal neuralgia	Y	NA
1524	spina bifida	N	neurology
1525	benign / essential tremor	Y	NA
1526	polio / poliomyelitis	N	neurology
1527	retinitis pigmentosa	Y	NA
1528	macular degeneration	Y	NA
1529	dry eyes	Y	NA
1530	iritis	Y	NA
1531	post-natal depression	Y	NA
1532	disc problem	Y	NA
1533	disc degeneration	Y	NA
1534	back pain	Y	NA
1535	scoliosis	Y	NA
1536	spinal stenosis	Y	NA
1537	joint pain	Y	NA
1538	arthritis (nos)	Y	NA
1540	plantar fascitis	Y	NA
1541	carpal tunnel syndrome	Y	NA
1542	fibromyalgia	Y	NA
1544	dupuytren's contracture	Y	NA
1545	neck problem/injury	Y	NA
1546	essential thrombocytosis	N	haematology
1548	acne/acne vulgaris	Y	NA
1549	lichen planus	Y	NA
1550	lichen sclerosis	Y	NA
1551	ovarian problem	Y	NA
1552	uterine problem	Y	NA
1553	cervical problem	Y	NA
1554	cervical intra-epithelial neoplasia (cin) / precancerous cells cervix	Y	NA
1555	cervical polyps	Y	NA
1556	menorrhagia (unknown cause)	Y	NA
1557	pelvic inflammatory disease/ pid	Y	NA
1558	ectopic pregnancy	Y	NA
1559	miscarriage	Y	NA
1560	breast fibroadenoma	Y	NA
1561	raynaud's phenomenon/disease	Y	NA
1562	food intolerance	Y	NA
1563	urticaria	Y	NA
1564	antiphospholipid syndrome	Y	NA
1566	mrsa / methicillin resistant staphylococcus aureus	N	infections
1567	infectious mononucleosis / glandular fever / epstein barr virus (ebv)	Y	NA
1568	measles / morbillivirus	Y	NA
1569	mumps / epidemic parotitis	Y	NA
1570	rubella / german measles	Y	NA
1571	chickenpox	Y	NA
1572	whooping cough / pertussis	Y	NA
1573	shingles	Y	NA
1574	diphtheria	N	infections
1575	herpes simplex	Y	infections
1576	dengue fever	N	infections
1577	typhoid fever	N	infections
1578	hepatitis a	Y	NA
1579	hepatitis b	N	gastrointestinal
1580	hepatitis c	N	gastrointestinal
1582	hepatitis e	N	gastrointestinal
1583	ischaemic stroke	N	cardiovascular
1584	mitral valve disease	N	cardiovascular
1585	mitral regurgitation / incompetence	N	cardiovascular
1586	aortic valve disease	N	cardiovascular
1587	aortic regurgitation / incompetence	N	cardiovascular
1588	hypertrophic cardiomyopathy (hcm / hocm)	N	cardiovascular
1589	pericarditis	N	cardiovascular
1590	pericardial effusion	N	cardiovascular
1591	aortic aneurysm rupture	N	cardiovascular
1592	aortic dissection	N	cardiovascular
1593	varicose ulcer	Y	NA
1594	respiratory infection	N	respiratory
1595	pleural plaques (not known asbestosis)	N	respiratory
1596	pleural effusion	Y	NA
1597	tinnitus / tiniitis	Y	NA
1598	tonsiltis	Y	NA
1599	constipation	Y	NA
1600	bowel / intestinal perforation	N	gastrointestinal
1601	bowel / intestinal infarction	N	gastrointestinal
1602	bowel / intestinal obstruction	N	gastrointestinal
1603	rectal prolapse	Y	NA
1604	alcoholic liver disease / alcoholic cirrhosis	N	gastrointestinal
1605	femoral hernia	Y	NA
1606	incisional hernia	Y	NA
1607	diabetic nephropathy	N	diabetes
1608	nephritis	N	renal
1609	glomerulnephritis	N	renal
1610	thyroid goitre	Y	NA
1611	hyperparathyroidism	Y	NA
1613	blepharitis / eyelid infection	Y	NA
1614	stress	N	psychiatry
1615	obsessive compulsive disorder (ocd)	N	psychiatry
1616	insomnia	Y	NA
1617	osteopenia	Y	NA
1618	soft tissue inflammation	Y	NA
1619	tendonitis / tendinitis / tenosynovitis	Y	NA
1620	bursitis	Y	NA
1621	synovitis	Y	NA
1622	epicondylitis	Y	NA
1623	tennis elbow / lateral epicondylitis	Y	NA
1624	housemaid's knee (prepatellar bursitis)	Y	NA
1625	cellulitis	Y	NA
1626	fracture skull / head	N	head_injury
1627	fracture jaw	Y	NA
1628	fracture nose	Y	NA
1629	fracture face / orbit / eye socket	Y	NA
1630	fracture neck / cervical fracture	Y	NA
1631	fracture clavicle / collar bone	Y	NA
1632	fracture shoulder / scapula	Y	NA
1633	fracture upper arm / humerus / elbow	Y	NA
1634	fracture forearm / wrist	Y	NA
1635	fracture radius	Y	NA
1636	fracture ulna	Y	NA
1637	fracture wrist / colles fracture	Y	NA
1638	fracture hand	Y	NA
1639	fracture finger	Y	NA
1640	fracture thumb	Y	NA
1644	fracture rib	Y	NA
1645	fracture sternum	Y	NA
1646	fracture vertebra / crush fracture / vertebral collapse	Y	NA
1647	fracture pelvis	Y	NA
1648	fracture neck of femur / hip	Y	NA
1649	fracture shaft of femur	Y	NA
1650	fracture patella / knee	Y	NA
1651	fracture lower leg / ankle	Y	NA
1652	fracture tibia	Y	NA
1653	fracture fibula	Y	NA
1654	fracture foot	Y	NA
1655	fracture metatarsal	Y	NA
1656	fracture toe	Y	NA
1657	septicaemia / sepsis	N	infections
1658	myelofibrosis	N	haematology
1659	meningioma / benign meningeal tumour	N	neurology
1660	rosacea	Y	NA
1661	vitiligo	Y	NA
1662	cervical erosion	Y	NA
1663	abnormal smear (cervix)	Y	NA
1664	dysmenorrhoea / dysmenorrhea	Y	NA
1665	menopausal symptoms / menopause	Y	NA
1666	benign breast lump	Y	NA
1667	alopecia / hair loss	Y	NA
1668	allergy to house dust mite	Y	NA
1669	contact dermatitis	Y	NA
1670	allergy to elastoplast	Y	NA
1671	allergy to nickel	Y	NA
1674	varicella zoster virus	Y	NA
1675	giardia / giardiasis	Y	NA
1676	yellow fever	Y	NA
1677	scarlet fever / scarlatina	Y	NA
1678	chlamydia	Y	NA
1679	undescended testicle	Y	NA
1680	bowen's disease	Y	NA
1681	hydatiform mole	Y	NA
1682	benign insulinoma	N	benign_tumour
1683	benign neuroma	N	benign_tumour

## Sheet: cancer_self_reported_codes
UK Biobank coding	Cancer	Healthy (Yes/No)	Disorder group
1001	lung cancer	N	Cancer
1002	breast cancer	N	Cancer
1003	skin cancer	N	Cancer
1004	cancer of lip/mouth/pharynx/oral cavity	N	Cancer
1005	salivary gland cancer	N	Cancer
1006	larynx/throat cancer	N	Cancer
1007	nasal cavity cancer	N	Cancer
1008	ear cancer	N	Cancer
1009	sinus cancer	N	Cancer
1010	lip cancer	N	Cancer
1011	tongue cancer	N	Cancer
1012	gum cancer	N	Cancer
1015	parotid gland cancer	N	Cancer
1016	other salivary gland cancer	N	Cancer
1017	oesophageal cancer	N	Cancer
1018	stomach cancer	N	Cancer
1019	small intestine/small bowel cancer	N	Cancer
1020	large bowel cancer/colorectal cancer	N	Cancer
1021	anal cancer	N	Cancer
1022	colon cancer/sigmoid cancer	N	Cancer
1023	rectal cancer	N	Cancer
1024	liver/hepatocellular cancer	N	Cancer
1025	gallbladder/bile duct cancer	N	Cancer
1026	pancreas cancer	N	Cancer
1027	small cell lung cancer	N	Cancer
1028	non-small cell lung cancer	N	Cancer
1029	peripheral nerve/autonomic nerve cancer	N	Cancer
1030	eye and/or adnexal cancer	N	Cancer
1031	meningeal cancer / malignant meningioma	N	Cancer
1032	brain cancer / primary malignant brain tumour	N	Cancer
1033	spinal cord or cranial nerve cancer	N	Cancer
1034	kidney/renal cell cancer	N	Cancer
1035	bladder cancer	N	Cancer
1036	other cancer of urinary tract	N	Cancer
1037	female genital tract cancer	N	Cancer
1038	male genital tract cancer	N	Cancer
1039	ovarian cancer	N	Cancer
1040	uterine/endometrial cancer	N	Cancer
1041	cervical cancer	N	Cancer
1042	vaginal cancer	N	Cancer
1043	vulval cancer	N	Cancer
1044	prostate cancer	N	Cancer
1045	testicular cancer	N	Cancer
1046	penis cancer	N	Cancer
1047	lymphoma	N	Cancer
1048	leukaemia	N	Cancer
1050	multiple myeloma	N	Cancer
1051	myelofibrosis or myelodysplasia	N	Cancer
1052	hodgkins lymphoma / hodgkins disease	N	Cancer
1053	non-hodgkins lymphoma	N	Cancer
1055	chronic lymphocytic	N	Cancer
1056	chronic myeloid	N	Cancer
1058	other haematological malignancy	N	Cancer
1059	malignant melanoma	N	Cancer
1060	non-melanoma skin cancer	N	Cancer
1061	basal cell carcinoma	N	Cancer
1062	squamous cell carcinoma	N	Cancer
1063	primary bone cancer	N	Cancer
1064	mesothelioma	N	Cancer
1065	thyroid cancer	N	Cancer
1066	parathyroid cancer	N	Cancer
1067	adrenal cancer	N	Cancer
1068	sarcoma/fibrosarcoma	N	Cancer
1070	malignant lymph node, unspecified	N	Cancer
1071	metastatic cancer (unknown primary)	N	Cancer
1072	cin/pre-cancer cells cervix	N	Cancer
1073	rodent ulcer	N	Cancer
1074	acute myeloid leukaemia	N	Cancer
1075	retinoblastoma	N	Cancer
1076	kaposis sarcoma	N	Cancer
1077	mouth cancer	N	Cancer
1078	tonsil cancer	N	Cancer
1079	oropharynx / oropharyngeal cancer	N	Cancer
1080	trachea cancer	N	Cancer
1081	thymus cancer / malignant thymoma	N	Cancer
1082	heart / mediastinum cancer	N	Cancer
1084	respiratory / intrathoracic cancer	N	Cancer
1085	bone metastases / bony secondaries	N	Cancer
1086	appendix cancer	N	Cancer
1087	fallopian tube cancer	N	Cancer
1088	malignant insulinoma	N	Cancer
